# Supplementary material
Source: PubMed Central journal article supplement (PMC4873372)
Supplement: NIHMS778412-supplement-2.pdf [file NIHMS778412-supplement-2.pdf]

**Supplemental Table 2. Real-time PCR primer set sequences (mouse).**

| Gene<br>Symbol | Primer Sequences (5'-3')        |                          |
|----------------|---------------------------------|--------------------------|
|                | Forward                         | Reverse                  |
| <i>Esr1</i>    | TTGTGTGCCTCAAATCCATC            | GAGATGCTCCATGCCTTTGT     |
| <i>Pgr</i>     | CTCCGGGACCGAACAGAGT             | ACAACAACCCTTTGGTAGCAG    |
| <i>Lgr5</i>    | CCTACTCGAAGACTTACCCAGT          | GCATTGGGGTGAATGATAGCA    |
| <i>Aldh1a1</i> | CCCGGATTTTTGTTGAGGAG            | GAGAACTGTGGGCTGCAC       |
| <i>Lhx9</i>    | ATGCTGTTCCACGGGATCTC            | CTTTGGTCAGACGGGCCTC      |
| <i>Muc16</i>   | GCCCATGTTCAAGAATAGCAGTATTG<br>G | GTAGCAGAGAGGGGCTTGTGGTTG |
| <i>Amhr2</i>   | ACCACAGACCACCACCTTTC            | CTGCACACACTCAGCTGTCA     |
| <i>Foxa2</i>   | GGAGGCAAGAAGACCGCTC             | CCTTTAGCTCGCTTAGGCCAC    |
| <i>Cxcl12</i>  | TGCATCAGTGACGGTAAACCA           | TTCTTCAGCCGTGCAACAATC    |
| <i>Bdnf</i>    | TCATACTTCGGTTGCATGAAGG          | AGACCTCTCGAACCTGCCC      |
| <i>Igfbp6</i>  | GCTGCTAATGCTGTTGTTTCGC          | GCACTTAGGGCTGTAGACCC     |
| <i>Ddit4</i>   | CAAGGCAAGAGCTGCCATAG            | CCGGTACTTAGCGTCAGGG      |
| <i>Dapk2</i>   | CTCGATGAGGAGCCCAAATATG          | CCCGGCACTTCTTCACGAT      |
| <i>Ccnb1</i>   | AAGGTGCCTGTGTGTGAACC            | GTCAGCCCCATCATCTGCG      |
| <i>Ndn</i>     | GAGGTCCCCGACTGTGAGAT            | TGCAGGATTTTAGGGTCAACATC  |
| <i>Ddx39</i>   | CCGGGACTTTCTACTGAAGCC           | GCACATGACCAGGACTGATAC    |
| <i>Eya4</i>    | TCCTTGGCCCTGCTAAGAG             | TGCCTATTTTTGTTGCGCTGT    |
| <i>Cdkn1a</i>  | GTACTIONCTCTGCCCTGCTG           | TCTGCGCTTGGAGTGATAGA     |
| <i>Btg2</i>    | ATGAGCCACGGGAAGAGAAC            | GCCCTACTGAAAACCTTGAGTC   |
| <i>Mdm2</i>    | TGATGAGGTCTATCGGGTCA            | GAAGCCAGTTCTCACGAAGG     |
| <i>Birc5</i>   | GAGGCTGGCTTCATCCACTG            | CTTTTTGCTTGTGTTGGTCTCC   |
| <i>Brca1</i>   | ATTGTTGTGAGCCCTTCACC            | CAGTCCCACATCACAAGACG     |
| <i>Cdkn2a</i>  | CGCAGGTTCTTGGTCACTGT            | TGTTACGAAAGCCAGAGCG      |
| <i>Bbc3</i>    | GCCCAGCAGCACTTAGAGTC            | GGGAGGAGTCCCATGAAGAG     |
