# Supplementary material
Source: PubMed Central journal article supplement (PMC4873372)

**Supplemental Figure 1.** Sequencing results of laser capture microdissected human mucinous tumor cells (12 patient samples total). Exons 5-8 of the TP53 genes were sequenced as previously described (Crane, 2015). Four out of 12 patients (33%) had point mutation in TP53 genes, and in all four cases, the mutation co-exist with the wild type allele.

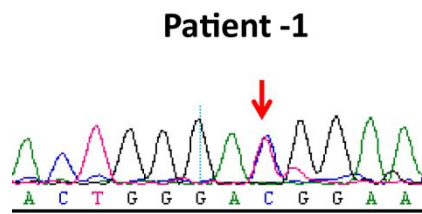

**c.799C>T; p.R267W**

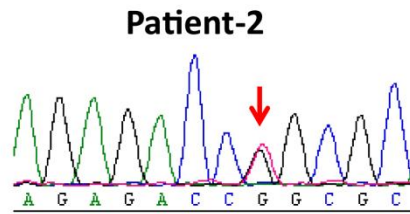

**c.845G>T; p.R282L**

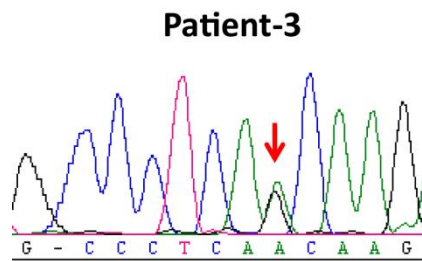

**c.392A>G; p.N131S**

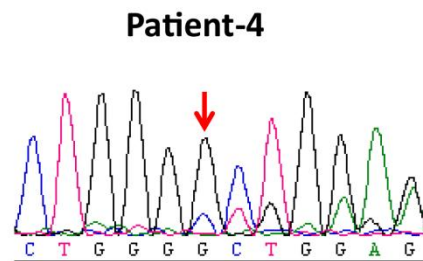

**IVS5<sup>del+14G</sup>**

**Supplemental Figure 2.** Representative images of immunofluorescent staining for ESR1 and PGR in cultured tumor OSE cells of different genetic background. Scale bar: 50  $\mu$ m.

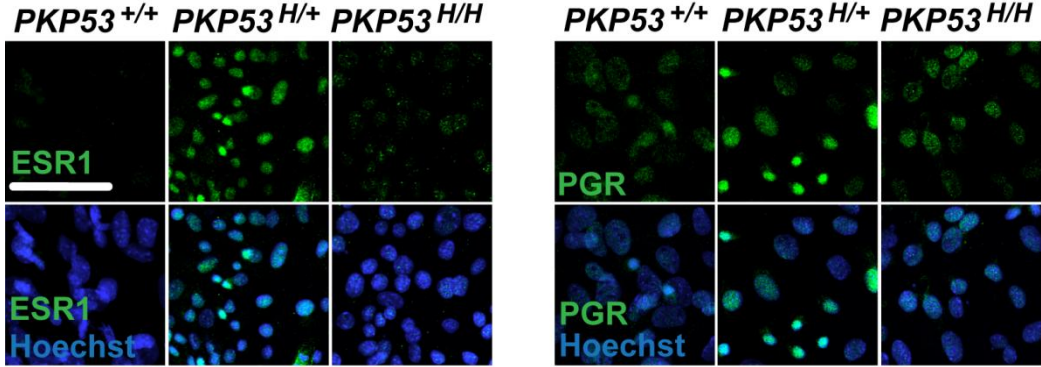

Supplement: NIHMS778412-supplement-3.pdf [file NIHMS778412-supplement-3.pdf]
